# Supplementary material for: Heart failure with preserved ejection fraction, atrial fibrillation, and the role of senile amyloidosis
Source: PubMed Central journal article supplement — Eur Heart J. 2019 Feb 8;40(16):1287–93. doi: 10.1093/eurheartj/ehz057 (PMC6553504; doi:10.1093/eurheartj/ehz057), 2019-02-08
Supplement: ehz057_supplementary_table_s1.pdf [file ehz057_supplementary_table_s1.pdf]

**Supplemental Table 1.** Potential pros and cons of tests for patients in whom ATTR amyloidosis is thought to play a role in heart failure and/or atrial fibrillation

|                                     | <b>Pros</b>                             | <b>Cons</b>                          |
|-------------------------------------|-----------------------------------------|--------------------------------------|
| <b>ECG</b>                          | easily obtainable, cheap                | poor sensitivity and specificity     |
| <b>Serum biomarkers<sup>a</sup></b> | easily obtainable, cheap                | poor sensitivity and specificity     |
| <b>Echocardiogram</b>               | easily obtainable                       | moderate sensitivity and specificity |
| <b>CMR</b>                          | good sensitivity, moderate specificity  | expensive, elaborative               |
| <b>Bone scintigraphy</b>            | excellent sensitivity and specificity   | radiation                            |
| <b>Biopsy</b>                       | good sensitivity, excellent specificity | invasive, risky                      |

<sup>a</sup>e.g. troponin, BNP

Note: Although the tests may be helpful in individual cases, the overall value of these tests regarding the different features of clusters of amyloidosis+atrial fibrillation without heart failure, amyloidosis+heart failure without atrial fibrillation, and amyloidosis+atrial fibrillation+heart failure remains to be fully defined.
